# Supplementary material for: Morphology-controllable bimetallic MOFs/textile composite electrodes with high areal capacitance for flexible electronic devices
Source: Royal Society of Chemistry journal article supplement (doi:10.1039/d2qm00126h), 2023-01-01
Supplement: d2qm00126h1.pdf [file d2qm00126h1.pdf]

1 *Supporting information*

2

3 **Morphology-controllable bimetallic MOFs/ textile composite**  
4 **electrodes with high areal capacitance for flexible electronic devices**

5 Shixiong Zhai <sup>a, b, c</sup>, Zhendong Jin <sup>a, b</sup>, Chengcheng Li <sup>a, b</sup>, JiaFeng Sun <sup>a, b</sup>, Hong Zhao  
6 <sup>a, b</sup>, Zhehai Jin <sup>a, b</sup>, Zaisheng Cai <sup>a, b</sup>, Yaping Zhao <sup>a, b, \*</sup>

7 <sup>a</sup> *Key Lab of Science & Technology of Eco-textile, Ministry of Education, College of Chemistry,*  
8 *Chemical Engineering and Biotechnology, Donghua University, Shanghai 201620, PR China*

9 <sup>b</sup> *College of Chemistry, Chemical Engineering and Biotechnology, Donghua University, Shanghai*  
10 *201620, PR China*

11 <sup>c</sup> *Department of Chemistry, University of Calgary, Calgary, Alberta, T2N 1N4, Canada*

12

13 **2. Experiments**

14 ***Supercapacitor assembly***

15 The as prepared NiC/NiCo12MOF (1 cm×1 cm) and carbon cloth (1 cm×1 cm)  
16 were used as positive and negative electrode, respectively. Nonwoven was used as  
17 diaphragm. Potassium hydroxide (KOH) was used as electrolyte. Wet electrodes  
18 (immersed into the KOH solution for 1 h) were attached on both sides of the non-  
19 woven diaphragm. polyester film was used as packaging material to fabricate the  
20 sandwiched NiC/NiCo12MOF based supercapacitor.

21 ***Error estimation***

22 In this work, each electrochemical performance test was carried out for three times.  
23 The data in the main article are the average values of the three tests.

24 ***Theoretical calculation***

25 To understand the molecular models of the NiCoMOFs, plane-wave density  
 26 functional theory (DFT + U) calculations of the electronic properties of the composite  
 27 material were carried out using the CASTEP module in Materials Studio (MS). The  
 28 GGA with a PBE functional was employed for DFT exchange correlation energy  
 29 calculations, and a cut-off of 380 eV was assigned to the plane-wave basis set. The  
 30 self-consistent field (SCF) tolerance was  $1 \times 10^{-5}$  eV. The periodic structure was  
 31 created with a 20 Å vacuum slab to avoid artificial interaction effects between the slab  
 32 and the mirror images. The Brillouin zone was sampled by a  $1 \times 1 \times 1$  k-point mesh.  
 33 The core electrons were replaced with ultrasoft pseudopotentials. The bottom two  
 34 layers were fixed and considered as a bulk structure. The geometrical configurations  
 35 and charge density difference plots were illustrated using VESTA software.

#### 36 *Equations and the meaning of the letters in the formula*

$$37 \quad Q = \frac{i \cdot \Delta t}{S} \quad (1)$$

$$38 \quad E = \frac{I \cdot \int V dt}{S} \quad (2)$$

$$39 \quad P = \frac{3600E}{\Delta t} \quad (3)$$

40 where  $Q$  (C cm<sup>-2</sup>),  $i$  (mA cm<sup>-2</sup>),  $\Delta t$  (s) are specific capacity, current density and  
 41 charge time;  $S$  (cm<sup>-2</sup>) are specific capacitance and area of electrode.  $E$  (Wh cm<sup>-2</sup>) and  
 42  $P$  (W cm<sup>-2</sup>) are energy density and power density.

$$i = a \times v^b \quad (4)$$

$$43 \quad \log(i) = b \log(v) + \log(a) \quad (5)$$

$$i(V)/\sqrt{v} = k_1 \sqrt{v} + k_2 \quad (6)$$

44 Where  $i$  (mA) represents loop current;  $V$ ,  $v$  are potential and scan rate;  $a$ ,  $b$ ,  $k_1$  and  $k_2$   
 45 are constants.

46

47

48

49

### 50 3. Results and discussion

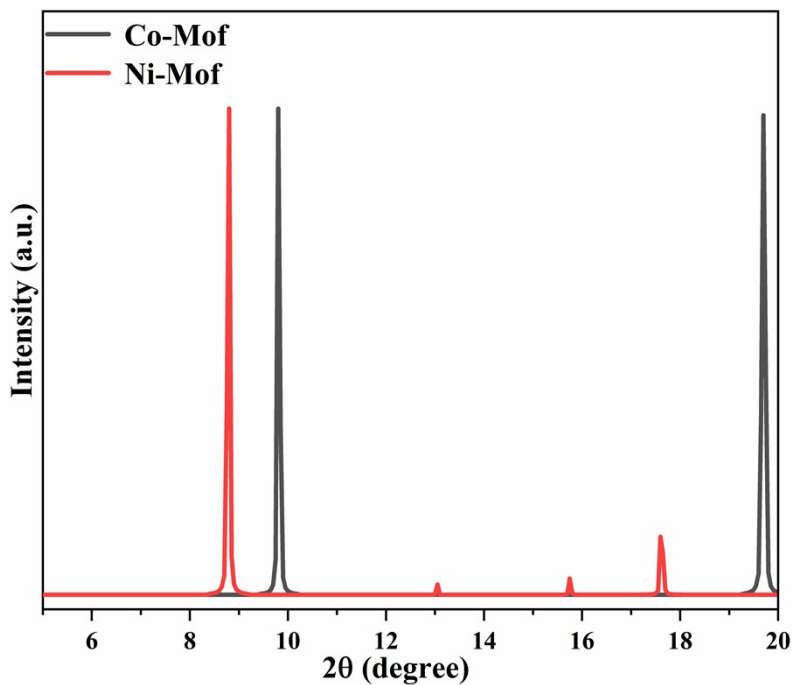

51

52 Fig. S1 Calculated XRD results for Co-MOF and Ni-MOFs

53

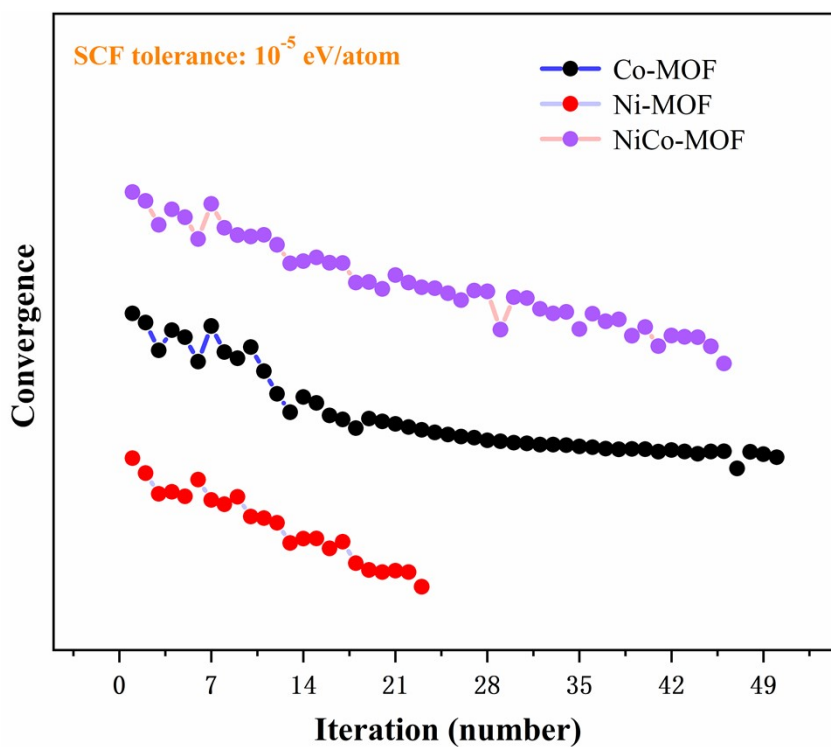

54

55 Fig. S2 The self-consistent field of the Ni-MOF, Co-MOF and NiCo-MOF.

56

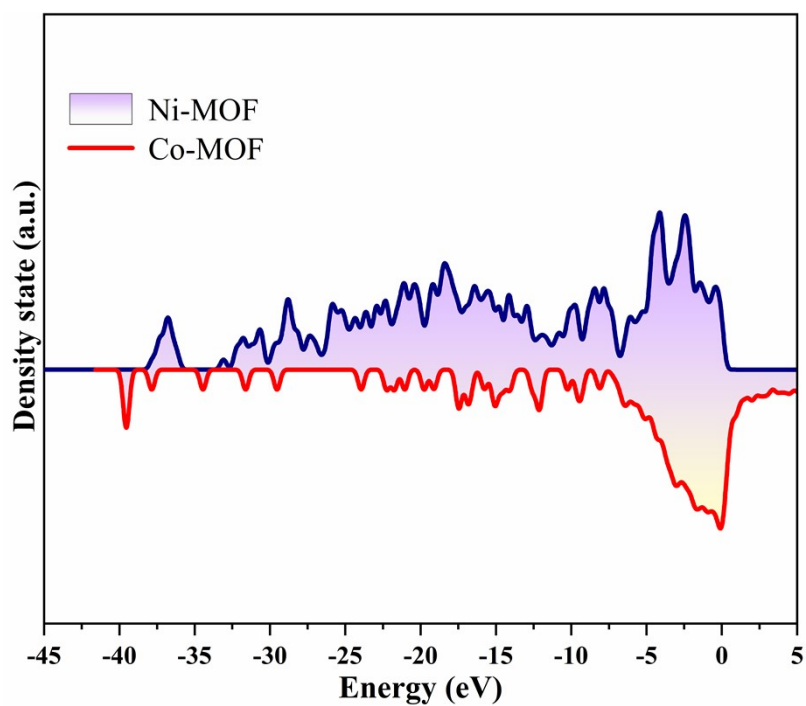

57

58 Fig. S3 Total density of state of the Ni-MOF and Co-MOF

59

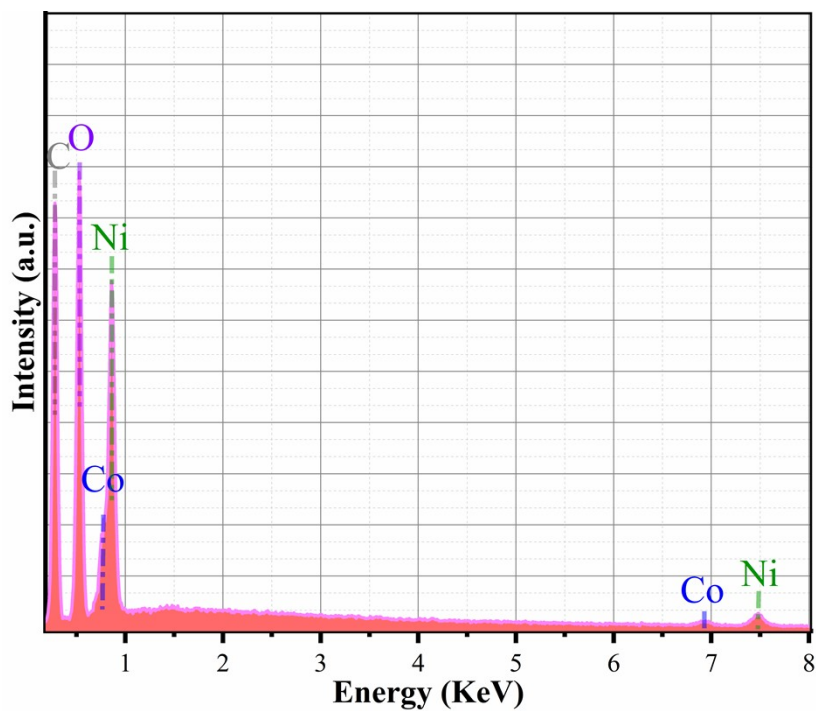

60

61 Fig. S4 EDS spectrum of NiC/NiCo<sub>21</sub>MOF

62

63

64

65  
66  
67

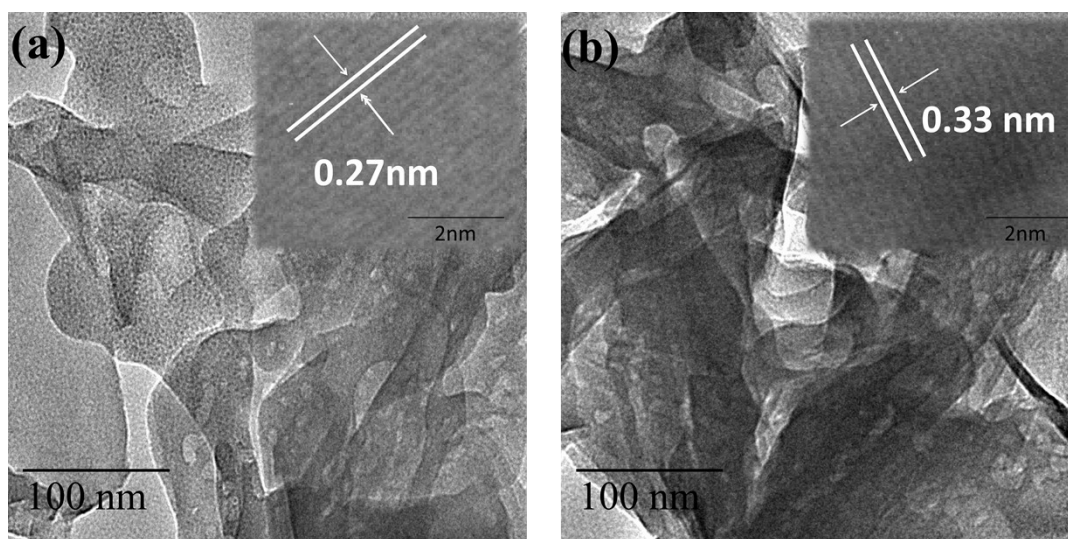

68  
69  
70  
71  
72

Fig. S5 TEM and HRTEM of NiC/NiCoMOF01 and NiC/NiCoMOF10

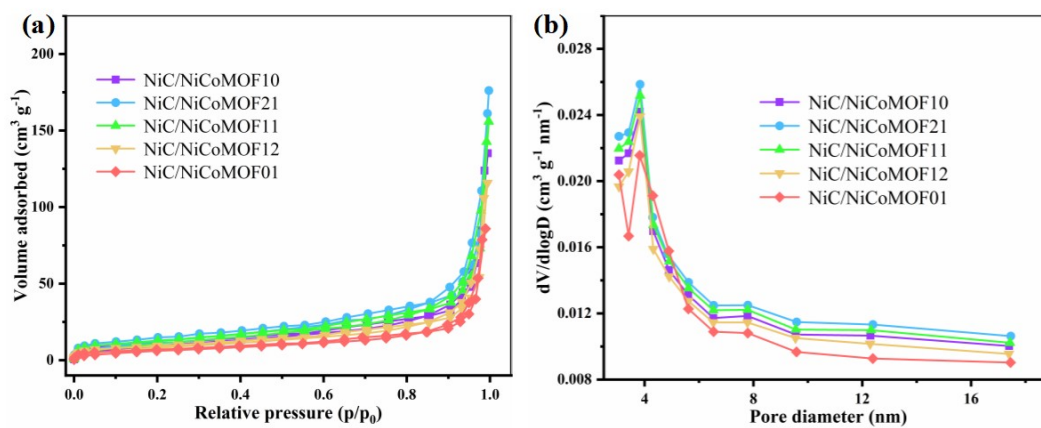

73  
74  
75  
76

Fig. S6 (a) N<sub>2</sub> adsorption–desorption isotherms of the samples; (b) Pore size distribution

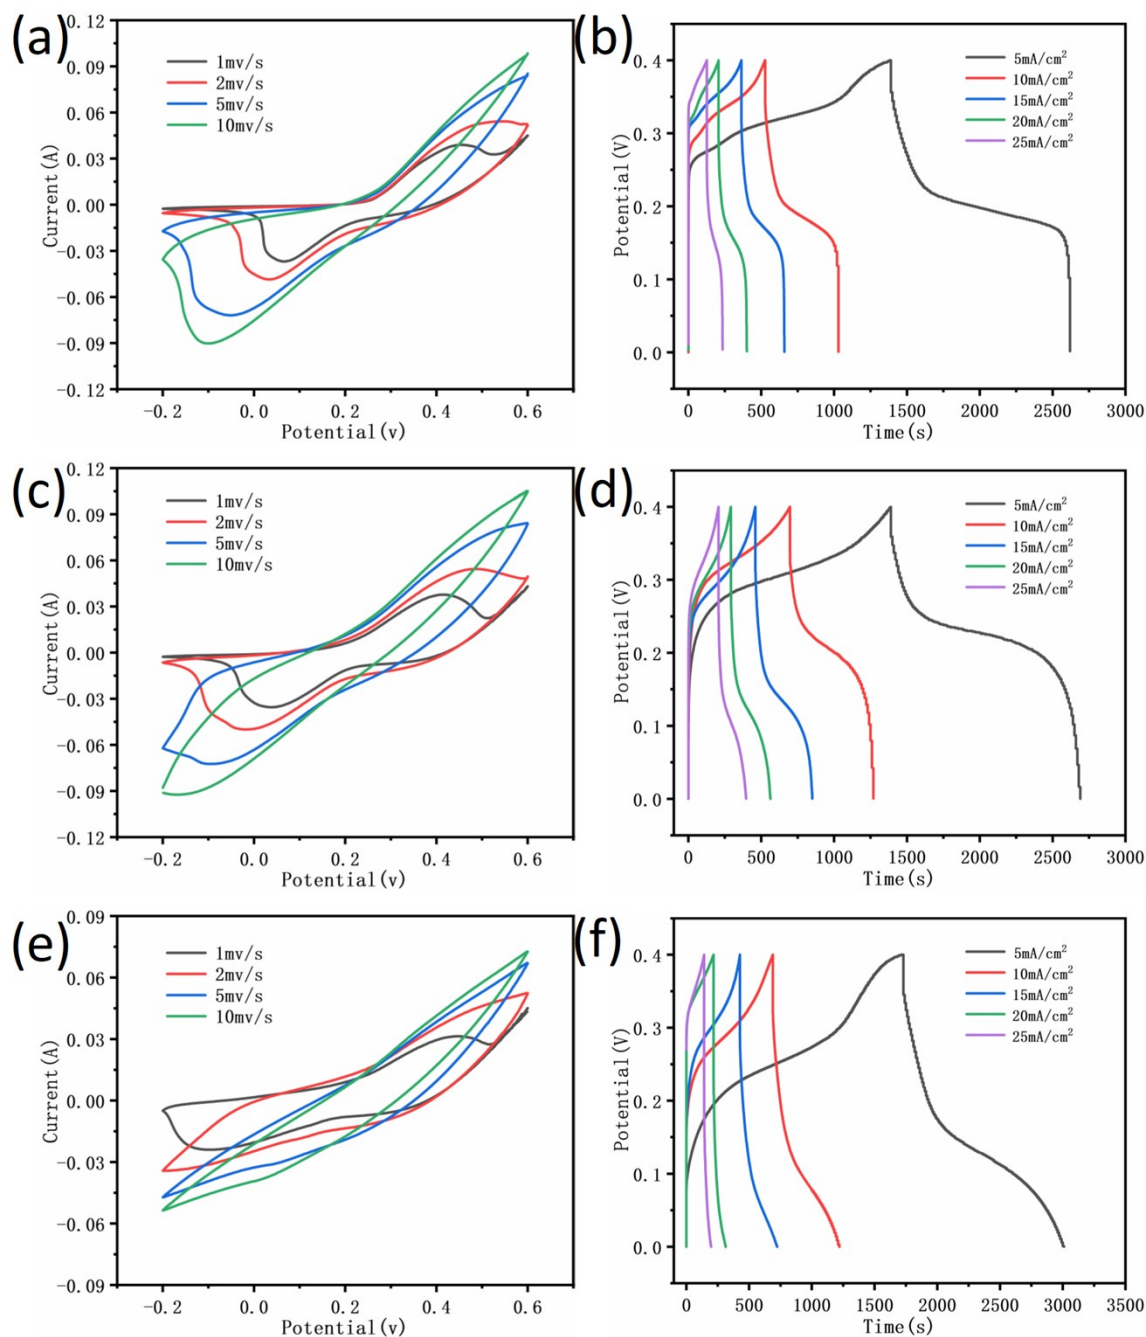

77

78 Fig. S7 CV and GCD curves of (a-b) NiC/NiCo10MOF; (c-d) NiC/NiCo11MOF; (e-f)

79 NiC/NiCo12MOF

80

81

82

83

84

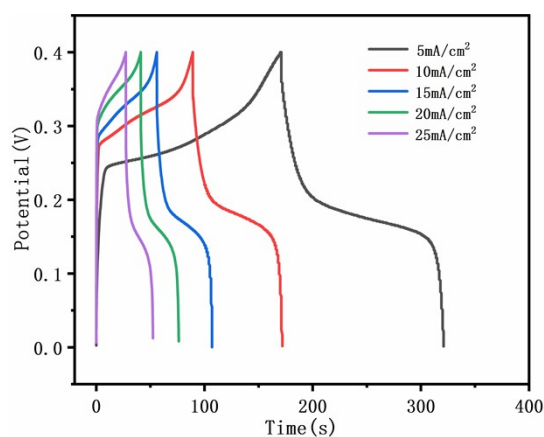

Fig. S8 GCD curves of NiC

Table S1 The comparison of the mass of samples before and after the reactions

| samples       | The mass of the sample before reaction (NiC) | The area of the samples | The mass of the sample after reaction (NiC/NiCo-MOF) | The mass loading of the samples (NiCo-MOF on NiC) |
|---------------|----------------------------------------------|-------------------------|------------------------------------------------------|---------------------------------------------------|
| NiC/NiCoMOF10 | 244 mg                                       | 3 cm × 3 cm             | 261 mg                                               | 1.9 mg cm <sup>-2</sup>                           |
| NiC/NiCoMOF11 | 236 mg                                       | 3 cm × 3 cm             | 254 mg                                               | 2.0 mg cm <sup>-2</sup>                           |
| NiC/NiCoMOF12 | 239 mg                                       | 3 cm × 3 cm             | 259 mg                                               | 2.2 mg cm <sup>-2</sup>                           |
| NiC/NiCoMOF21 | 242 mg                                       | 3 cm × 3 cm             | 261 mg                                               | 2.1 mg cm <sup>-2</sup>                           |
| NiC/NiCoMOF01 | 232 mg                                       | 3 cm × 3 cm             | 248 mg                                               | 1.8 mg cm <sup>-2</sup>                           |

Table S2 The sheet resistance of the samples

| samples       | Sheet resistance ( $\Omega/\square$ ) |
|---------------|---------------------------------------|
| Cotton        | Insulation                            |
| Cotton/Ni     | 3.2                                   |
| NiC/NiCoMOF10 | 27.5                                  |
| NiC/NiCoMOF11 | 25.6                                  |
| NiC/NiCoMOF12 | 25.3                                  |
| NiC/NiCoMOF21 | 26.1                                  |
| NiC/NiCoMOF01 | 25.1                                  |
